# Supplementary material for: Time-Resolved Kinetic Measurement of Microalgae Agglomeration for Screening of Polysaccharides-Based Coagulants/Flocculants
Source: MDPI journal article supplement (doi:10.3390/ijerph192114610), 2022-11-07

# Time-Resolved Kinetic Measurement of Microalgae Agglomeration for Screening of Polysaccharides-Based Coagulants/Flocculants

## Supplementary Materials

**Table S1 Zeta potential and size dimensions of microalgae and polysaccharides**

**Figure S1 Visible spectra of different microalgae suspensions**

(a) *M. aeruginosa*; (b) *S. platensis*; (c) *S. maxima*; (d) *C. vulgaris*; (e) *I. galbana*

**Figure S2 Visible spectra of different cationic polysaccharides and BEPS**

**Figure S3 Weber and Morris kinetic profiles of *M. aeruginosa* and *C. vulgaris* coagulation by cationic polysaccharides**

(a) *M. aeruginosa*; (b) *C. vulgaris*

**Figure S4 Time-resolved kinetic profiles of microalgae coagulation by AMP, PmEPS and xanthan**

**Table S1 Zeta potential and size dimensions of microalgae and polysaccharides**

| Sample                                                       | Zeta potential (mV) | Size dimensions ( $\mu\text{m}$ ) |
|--------------------------------------------------------------|---------------------|-----------------------------------|
| <i>M. aeruginosa</i> (OD <sub>680</sub> =0.25)               | - (10.5 $\pm$ 1.5)  | 3.33 $\pm$ 0.24                   |
| <i>S. platensis</i> (OD <sub>680</sub> =0.25)                | - (17.1 $\pm$ 2.1)  | 29.17 $\pm$ 1.51                  |
| <i>S. maxima</i> (OD <sub>680</sub> =0.25)                   | - (14.5 $\pm$ 1.2)  | 33.15 $\pm$ 2.7                   |
| <i>C. vulgaris</i> (OD <sub>680</sub> =0.25)                 | - (22.7 $\pm$ 3.5)  | 3.378 $\pm$ 0.15                  |
| <i>I. galbanai</i> (OD <sub>680</sub> =0.25)                 | - (14.8 $\pm$ 1.2)  | 4.88 $\pm$ 0.06                   |
| <i>Agrobacterium</i> mucopolysaccharides (AMP, 100 mg/L)     | - (30.6 $\pm$ 1.8)  | /                                 |
| <i>P. mucilaginosus</i> exopolysaccharides (PmEPS, 100 mg/L) | - (29.8 $\pm$ 1.3)  | /                                 |
| Xanthan (100 mg/L)                                           | - (41.3 $\pm$ 1.8)  | /                                 |
| Cationic hydroxyethyl cellulose (CHEC, 10 mg/L)              | + (25.6 $\pm$ 2.6)  | /                                 |
| Chitosan quaternary ammonium (CQA, 10 mg/L)                  | + (34.6 $\pm$ 4.8)  | /                                 |
| Cationic guar gum (CGG, 10 mg/L)                             | + (16.0 $\pm$ 1.2)  | /                                 |

**Figure S1 Visible spectra of different microalgae suspensions**

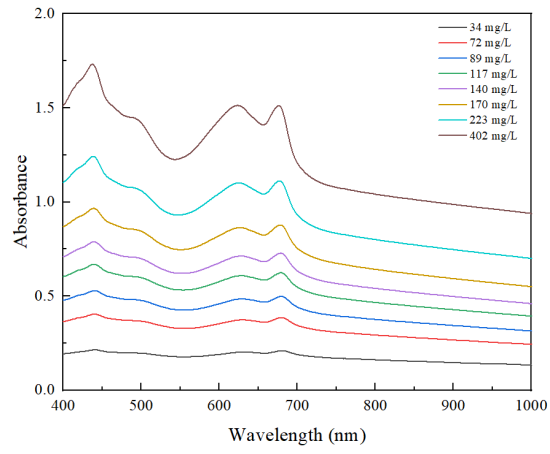

(a) *M. aeruginosa*

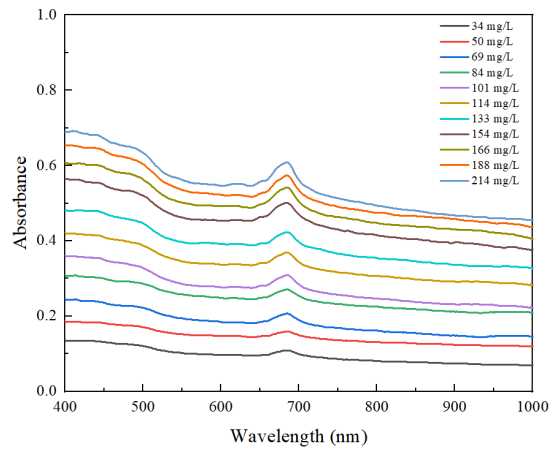

(b) *S. platensis*

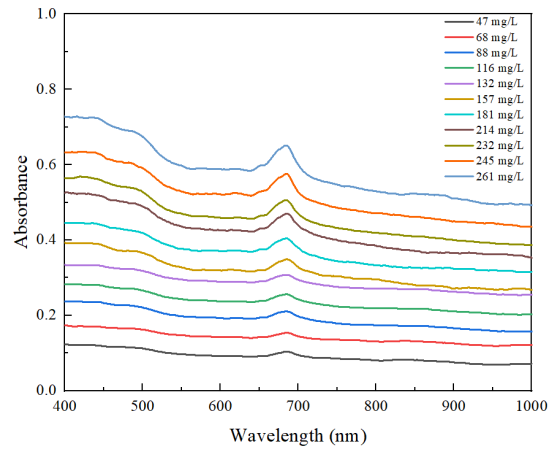

(c) *S. maxima*

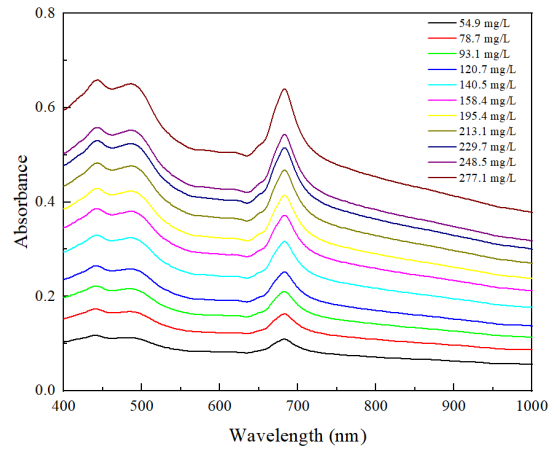

(d) *C. vulgaris*

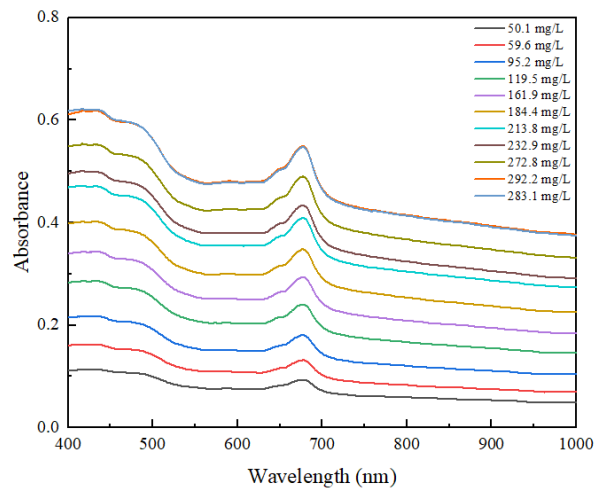

(e) *I. galbana*

**Figure S2 Visible spectra of different cationic polysaccharides and BEPS**

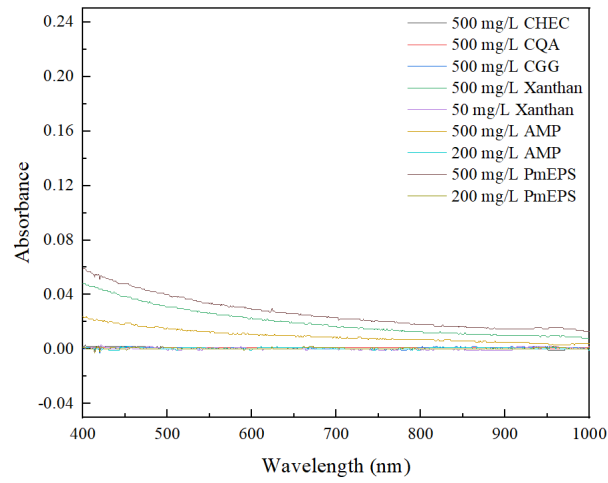

**Figure S3 Weber and Morris kinetic profiles of *M. aeruginosa* and *C. vulgaris* coagulation by cationic polysaccharides**

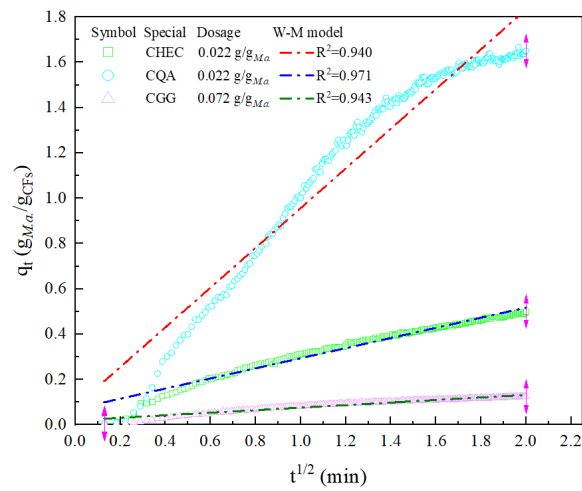

**(a) *M. aeruginosa***

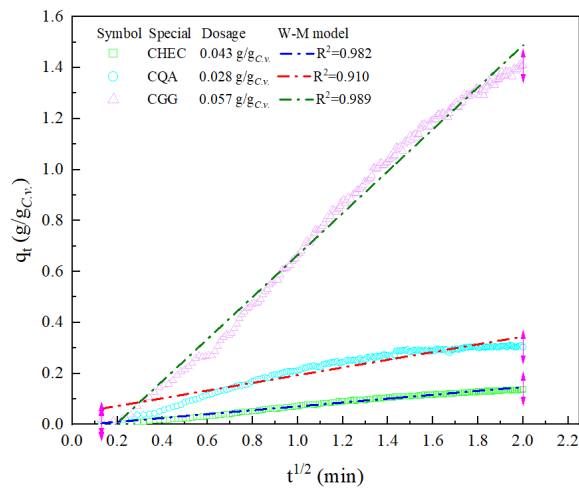

**(b) *C. vulgaris***

**Figure S4 Time-resolved kinetic profiles of microalgae coagulation by AMP, PmEPS and xanthan**

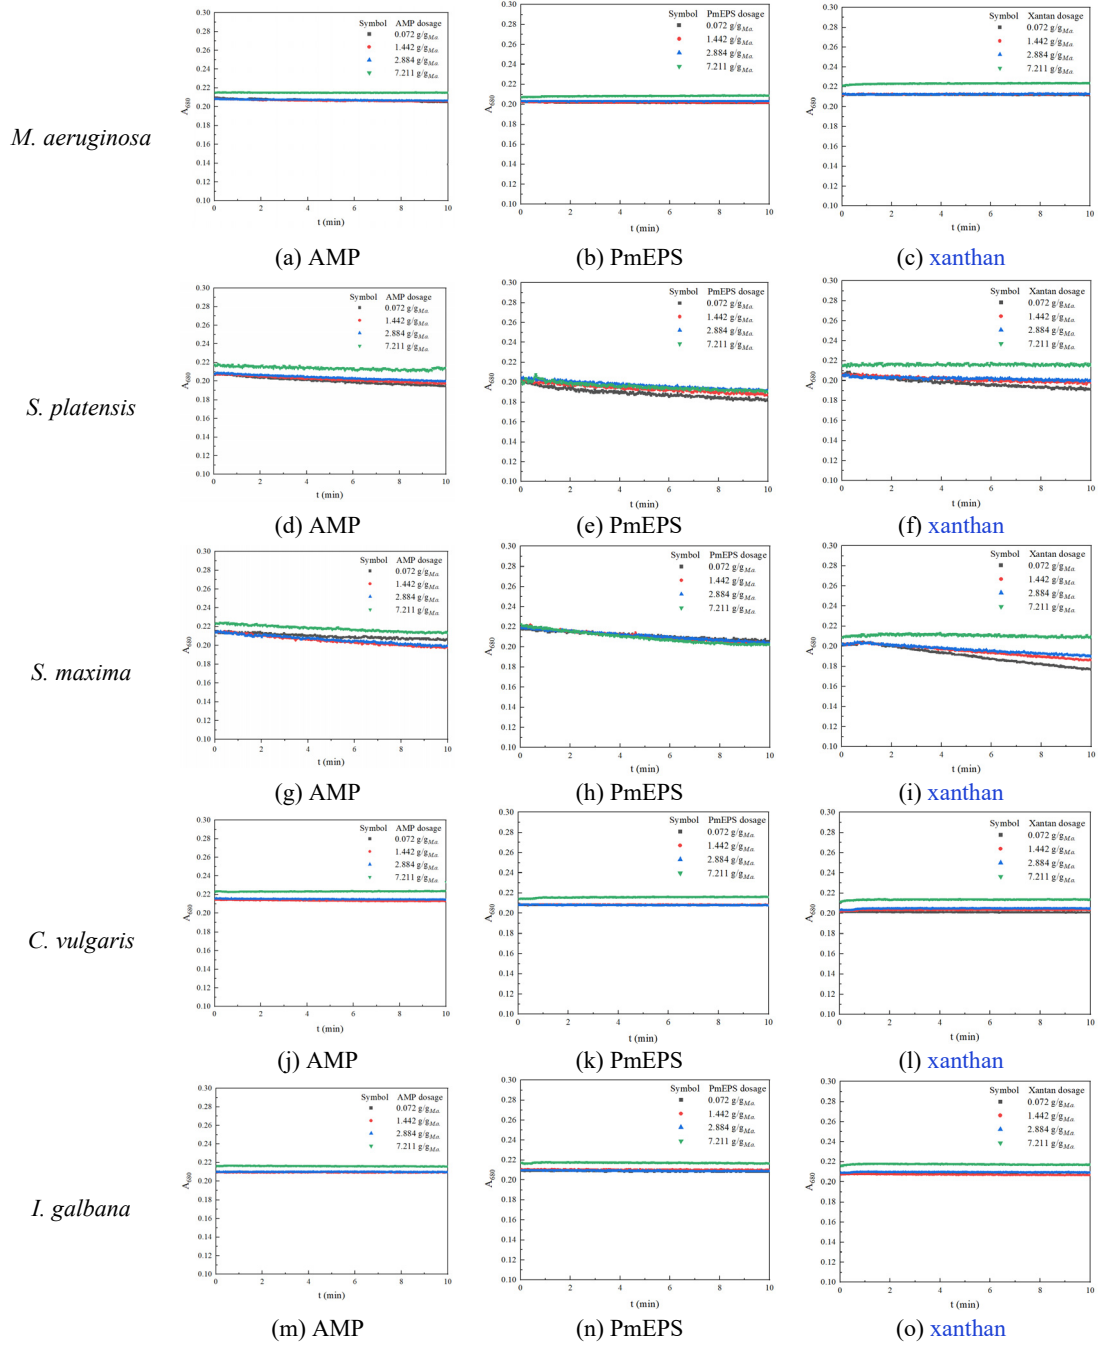

Supplement: s1 [file s1]
